# Supplementary material
Source: publisher site journal article supplement (https://www.dovepress.com/article/578852)
Supplement: Supplementary file 1 [file 578852_Revised%20Supplementary%20Figures%20S1-S2.pdf]

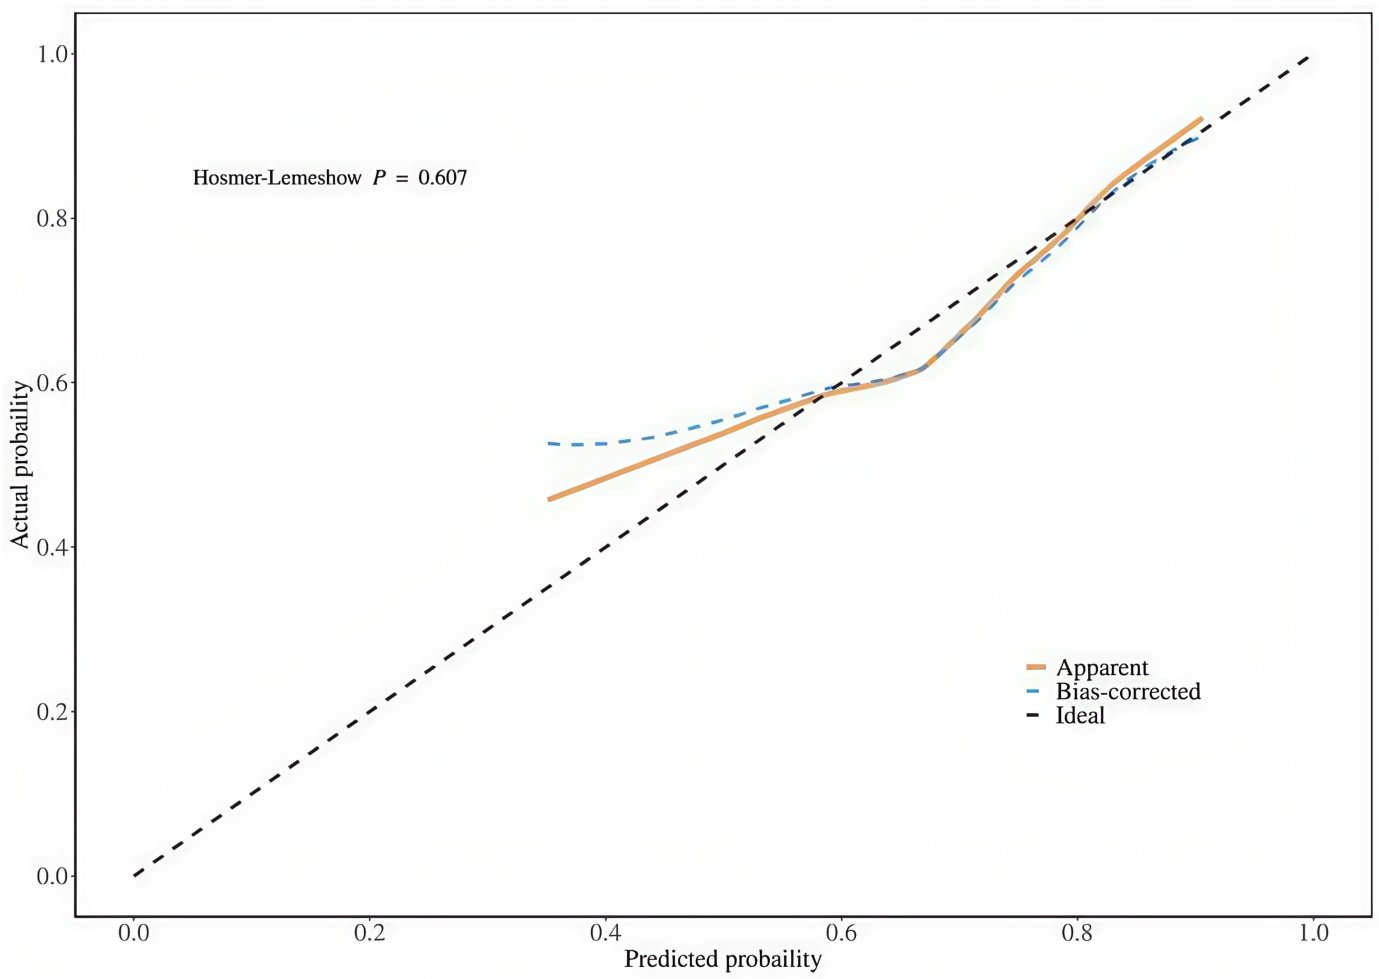

Figure S1 Calibration curve for the nomogram to predict treatment outcome. Hosmer-Lemeshow: P = 0.607.

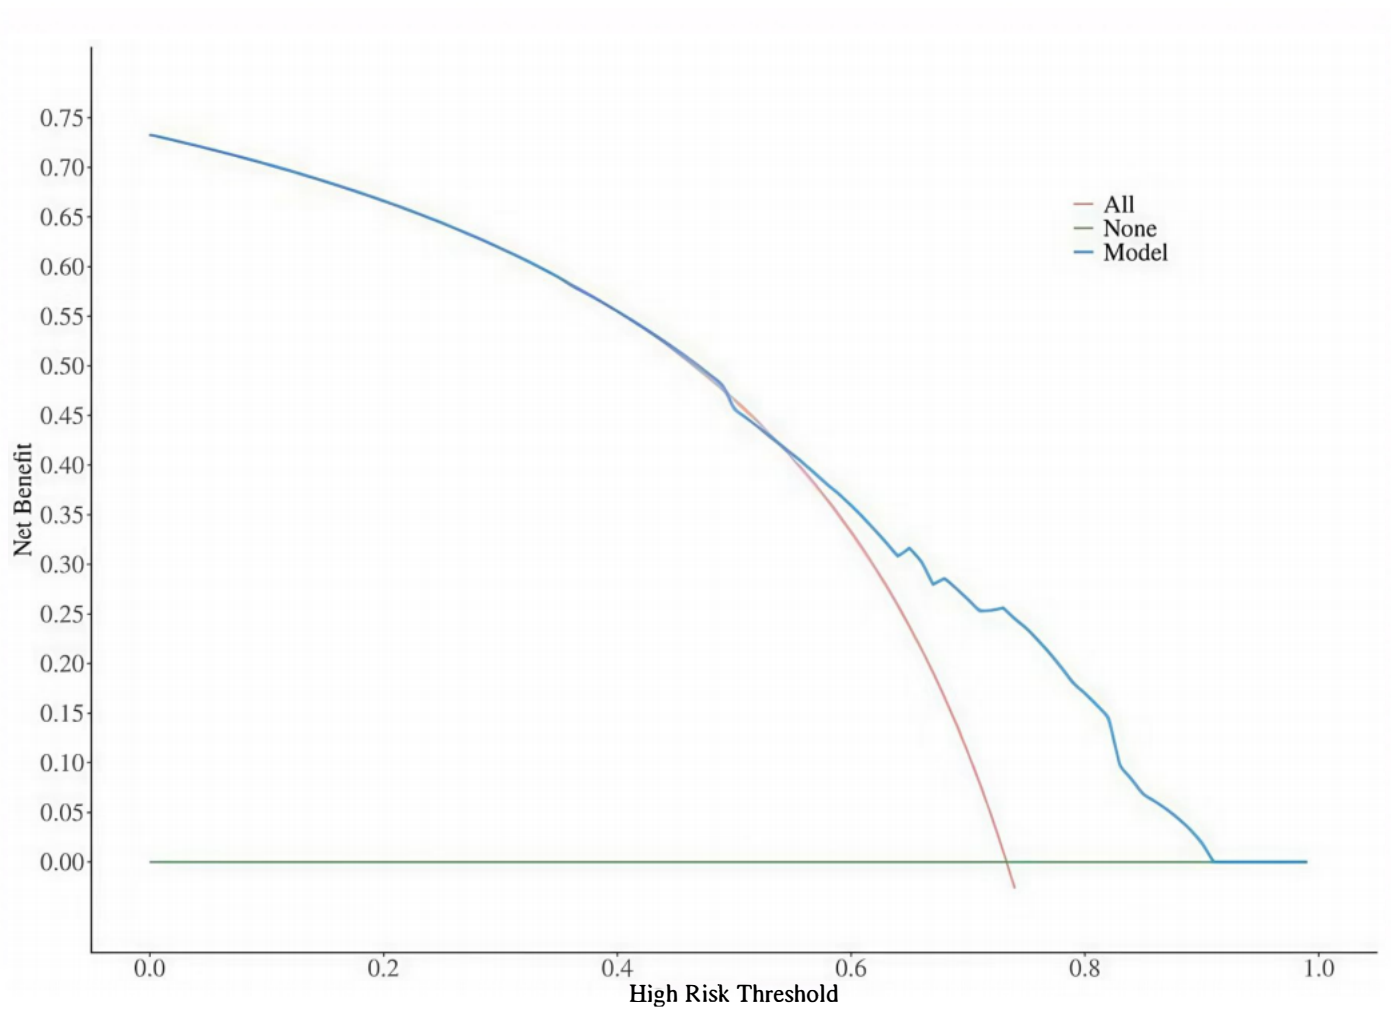

Figure S2 Clinical decision curve (DCA) for the nomogram to predict treatment outcome.
